# Supplementary material for: Functional random forest with applications in dose-response predictions
Source: PubMed Central journal article supplement (PMC6367407; doi:10.1038/s41598-018-38231-w), 2019-02-07
Supplement: 41598_2018_38231_MOESM1_ESM.pdf [file 41598_2018_38231_MOESM1_ESM.pdf]

# Supplementary: Functional Random Forest with applications in dose response predictions

Raziur Rahman, Saugato Rahman Dhruba, Souparno Ghosh and Ranadip Pal

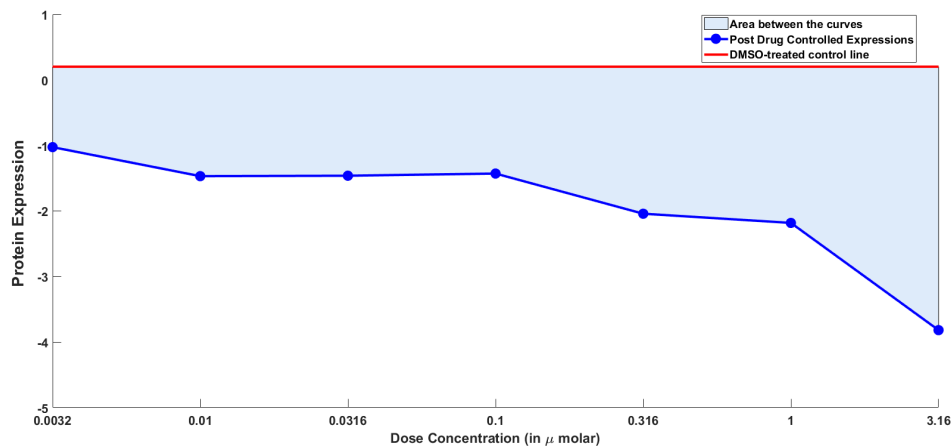

Figure S1: Post Drug and DMSO-treated Protein Expression for Drug AZ-628 for Cell Line C32 for p-S6 protein

Table S1: Correlation coefficient and Mean Absolute Error (MAE) between actual and predicted drug sensitivities ( $AUC$ ) for 3 methods; RF, FRFL and FRF with three different model constructions. In FRFL and FRF, node cost is calculated using 8 dose regions. Here, results of all 24 drugs of CCLE database are shown.

| Drug Name             | FRF node cost criteria                                 | Correlation Coefficient |               |               | Mean Absolute Error |               |               |
|-----------------------|--------------------------------------------------------|-------------------------|---------------|---------------|---------------------|---------------|---------------|
|                       |                                                        | RF                      | FRFL          | FRF           | RF                  | FRFL          | FRF           |
| 17-AAG                | Points from 8 dose regions                             | 0.3181                  | 0.338         | <b>0.4213</b> | 0.1009              | <b>0.1002</b> | 0.1108        |
|                       | Distributions from 8 dose regions (KL divergence)      |                         | 0.234         | 0.3317        |                     | 0.1022        | 0.1146        |
|                       | Distributions from 8 dose regions (Hellinger Distance) |                         | 0.2962        | 0.3424        |                     | 0.1018        | 0.1144        |
| AZD-0530              | Points from 8 dose regions                             | 0.3095                  | <b>0.3459</b> | 0.3041        | 0.0684              | 0.0676        | <b>0.0618</b> |
|                       | Distributions from 8 dose regions (KL divergence)      |                         | 0.3127        | 0.2997        |                     | 0.0689        | 0.0622        |
|                       | Distributions from 8 dose regions (Hellinger Distance) |                         | 0.3023        | 0.2926        |                     | 0.0692        | 0.0622        |
| AZD-6244              | Points from 8 dose regions                             | 0.4866                  | 0.5242        | <b>0.5716</b> | 0.1009              | 0.0994        | <b>0.0994</b> |
|                       | Distributions from 8 dose regions (KL divergence)      |                         | 0.4809        | 0.5296        |                     | 0.1015        | 0.1014        |
|                       | Distributions from 8 dose regions (Hellinger Distance) |                         | 0.4889        | 0.522         |                     | 0.1015        | 0.1016        |
| Lapatinib             | Points from 8 dose regions                             | 0.4552                  | 0.4688        | 0.5052        | 0.0579              | 0.0573        | 0.048         |
|                       | Distributions from 8 dose regions (KL divergence)      |                         | 0.4524        | 0.5056        |                     | 0.0578        | 0.0481        |
|                       | Distributions from 8 dose regions (Hellinger Distance) |                         | 0.4633        | <b>0.5285</b> |                     | 0.0578        | <b>0.0474</b> |
| Nutlin-3              | Points from 8 dose regions                             | 0.0542                  | <b>0.124</b>  | 0.0648        | 0.0356              | 0.0354        | <b>0.0302</b> |
|                       | Distributions from 8 dose regions (KL divergence)      |                         | 0.0993        | 0.0519        |                     | 0.0353        | 0.0302        |
|                       | Distributions from 8 dose regions (Hellinger Distance) |                         | 0.0796        | 0.0238        |                     | 0.0354        | 0.0304        |
| Paclitaxel            | Points from 8 dose regions                             | 0.3934                  | 0.3905        | 0.4251        | 0.1215              | 0.1216        | 0.1241        |
|                       | Distributions from 8 dose regions (KL divergence)      |                         | 0.3773        | 0.4022        |                     | 0.1207        | 0.1236        |
|                       | Distributions from 8 dose regions (Hellinger Distance) |                         | 0.3932        | 0.4266        |                     | 0.1209        | 0.1238        |
| PD-0332991            | Points from 8 dose regions                             | 0.4115                  | 0.4394        | 0.4180        | 0.0512              | 0.0503        | <b>0.0459</b> |
|                       | Distributions from 8 dose regions (KL divergence)      |                         | 0.4226        | 0.3968        |                     | 0.0506        | 0.0463        |
|                       | Distributions from 8 dose regions (Hellinger Distance) |                         | <b>0.4445</b> | 0.4127        |                     | 0.0503        | 0.0463        |
| PF2341066 /Crizotinib | Points from 8 dose regions                             | 0.2931                  | <b>0.3266</b> | 0.3095        | 0.0459              | 0.0452        | <b>0.0372</b> |
|                       | Distributions from 8 dose regions (KL divergence)      |                         | 0.2742        | 0.2434        |                     | 0.0462        | 0.0378        |
|                       | Distributions from 8 dose regions (Hellinger Distance) |                         | 0.2281        | 0.1755        |                     | 0.0464        | 0.0384        |
| PHA-665752            | Points from 8 dose regions                             | 0.1695                  | 0.1902        | 0.1588        | 0.0469              | 0.0464        | <b>0.0375</b> |
|                       | Distributions from 8 dose regions (KL divergence)      |                         | <b>0.2031</b> | 0.1898        |                     | 0.0457        | 0.0375        |
|                       | Distributions from 8 dose regions (Hellinger Distance) |                         | 0.198         | 0.1592        |                     | 0.0457        | 0.0378        |
| Sorafenib             | Points from 8 dose regions                             | 0.3755                  | <b>0.3824</b> | 0.3668        | 0.0384              | 0.0383        | <b>0.0321</b> |
|                       | Distributions from 8 dose regions (KL divergence)      |                         | 0.3390        | 0.3023        |                     | 0.0391        | 0.0328        |
|                       | Distributions from 8 dose regions (Hellinger Distance) |                         | 0.3392        | 0.3143        |                     | 0.0392        | 0.0327        |
| AEW541                | Points from 8 dose regions                             | 0.2757                  | 0.2619        | <b>0.3073</b> | 0.0545              | 0.0548        | <b>0.0487</b> |
|                       | Distributions from 8 dose regions (KL divergence)      |                         | 0.2331        | 0.2758        |                     | 0.0554        | 0.0493        |

Table S1: Correlation coefficient and Mean Absolute Error (MAE) between actual and predicted drug sensitivities ( $AUC$ ) for 3 methods; RF, FRFL and FRF with three different model constructions. In FRFL and FRF, node cost is calculated using 8 dose regions. Here, results of all 24 drugs of CCLE database are shown.

| Drug Name    | FRF node cost criteria                                 | Correlation Coefficient |               |               | Mean Absolute Error |               |               |
|--------------|--------------------------------------------------------|-------------------------|---------------|---------------|---------------------|---------------|---------------|
|              |                                                        | RF                      | FRFL          | FRF           | RF                  | FRFL          | FRF           |
|              | Distributions from 8 dose regions (Hellinger Distance) |                         | 0.2409        | 0.2875        |                     | 0.0553        | 0.0491        |
| Irinotecan   | Points from 8 dose regions                             | 0.519                   | 0.5234        | <b>0.5344</b> | 0.0881              | 0.0875        | 0.1021        |
|              | Distributions from 8 dose regions (KL divergence)      |                         | 0.528         | 0.5321        |                     | <b>0.0872</b> | 0.1021        |
|              | Distributions from 8 dose regions (Hellinger Distance) |                         | 0.5285        | 0.5332        |                     | 0.0883        | 0.1029        |
| L-685458     | Points from 8 dose regions                             | 0.3611                  | 0.3754        | <b>0.4000</b> | 0.0416              | 0.0412        | <b>0.0295</b> |
|              | Distributions from 8 dose regions (KL divergence)      |                         | 0.3571        | 0.3810        |                     | 0.0416        | 0.0302        |
|              | Distributions from 8 dose regions (Hellinger Distance) |                         | 0.3553        | 0.3758        |                     | 0.0417        | 0.0301        |
| LBW242       | Points from 8 dose regions                             | 0.1140                  | 0.1217        | <b>0.1377</b> | 0.0563              | 0.0556        | <b>0.0517</b> |
|              | Distributions from 8 dose regions (KL divergence)      |                         | 0.0662        | 0.1032        |                     | 0.0558        | 0.0526        |
|              | Distributions from 8 dose regions (Hellinger Distance) |                         | 0.0661        | 0.1198        |                     | 0.0562        | 0.0528        |
| Panobinostat | Points from 8 dose regions                             | 0.5239                  | 0.5335        | 0.5584        | <b>0.0640</b>       | 0.0641        | 0.0724        |
|              | Distributions from 8 dose regions (KL divergence)      |                         | 0.5101        | 0.5374        |                     | 0.0651        | 0.0739        |
|              | Distributions from 8 dose regions (Hellinger Distance) |                         | 0.5388        | <b>0.5611</b> |                     | 0.0643        | 0.0731        |
| RAF265       | Points from 8 dose regions                             | 0.3739                  | 0.3992        | <b>0.4149</b> | 0.0687              | <b>0.0684</b> | 0.0716        |
|              | Distributions from 8 dose regions (KL divergence)      |                         | 0.3557        | 0.3735        |                     | 0.0690        | 0.0724        |
|              | Distributions from 8 dose regions (Hellinger Distance) |                         | 0.3005        | 0.3123        |                     | 0.0704        | 0.0738        |
| TKI258       | Points from 8 dose regions                             | 0.3799                  | <b>0.3986</b> | 0.3831        | 0.0512              | 0.0506        | <b>0.0447</b> |
|              | Distributions from 8 dose regions (KL divergence)      |                         | 0.3408        | 0.3041        |                     | 0.0521        | 0.0461        |
|              | Distributions from 8 dose regions (Hellinger Distance) |                         | 0.3377        | 0.3261        |                     | 0.0523        | 0.0457        |
| Topotecan    | Points from 8 dose regions                             | 0.5122                  | 0.5006        | 0.5297        | 0.1055              | 0.1061        | 0.1161        |
|              | Distributions from 8 dose regions (KL divergence)      |                         | 0.5138        | <b>0.5342</b> |                     | <b>0.1053</b> | 0.1158        |
|              | Distributions from 8 dose regions (Hellinger Distance) |                         | 0.4983        | 0.5255        |                     | 0.1069        | 0.1176        |
| ZD-6474      | Points from 8 dose regions                             | 0.2428                  | 0.2696        | 0.2735        | 0.0641              | 0.0634        | <b>0.0581</b> |
|              | Distributions from 8 dose regions (KL divergence)      |                         | 0.2602        | <b>0.2842</b> |                     | 0.0634        | 0.0582        |
|              | Distributions from 8 dose regions (Hellinger Distance) |                         | 0.185         | 0.2107        |                     | 0.0643        | 0.059         |

Table S2: Mean Absolute Error (MAE) between actual and predicted drug sensitivities ( $AUC$  and different  $IC$ 's) for 2 methods; RF and FRF. In FRF, node cost is calculated using 8  $IC$  regions. Here, results of all 140 drugs of GDSC database  $v5$  are shown.

| Drug Name | Model | $AUC$  | $IC_{10}$ | $IC_{20}$ | $IC_{30}$ | $IC_{40}$ | $IC_{50}$ | $IC_{60}$ | $IC_{70}$ | $IC_{80}$ | Average |
|-----------|-------|--------|-----------|-----------|-----------|-----------|-----------|-----------|-----------|-----------|---------|
| Erlotinib | RF    | 0.0596 | 2.0831    | 1.7472    | 1.5039    | 1.3291    | 1.1948    | 1.0692    | 1.0133    | 1.0304    | 1.3714  |
|           | FRF   | 0.0486 | 1.9813    | 1.6597    | 1.4382    | 1.2694    | 1.1357    | 1.0361    | 0.9867    | 1.0095    | 1.3146  |
| Rapamycin | RF    | 0.064  | 4.3771    | 3.4771    | 2.937     | 2.5294    | 2.2       | 2.0355    | 2.0207    | 2.5359    | 2.7641  |

Table S2: Mean Absolute Error (MAE) between actual and predicted drug sensitivities ( $AUC$  and different  $IC$ 's) for 2 methods; RF and FRF. In FRF, node cost is calculated using 8  $IC$  regions. Here, results of all 140 drugs of GDSC database  $v5$  are shown.

| Drug Name            | Model | $AUC$  | $IC_{10}$ | $IC_{20}$ | $IC_{30}$ | $IC_{40}$ | $IC_{50}$ | $IC_{60}$ | $IC_{70}$ | $IC_{80}$ | Average |
|----------------------|-------|--------|-----------|-----------|-----------|-----------|-----------|-----------|-----------|-----------|---------|
| Sunitinib            | FRF   | 0.0636 | 4.3905    | 3.4525    | 2.8895    | 2.4642    | 2.1379    | 1.9446    | 2.0046    | 2.4707    | 2.7193  |
|                      | RF    | 0.0963 | 1.5494    | 1.5297    | 1.5542    | 1.6105    | 1.6518    | 1.7013    | 1.775     | 1.8728    | 1.6556  |
| PHA-665752           | FRF   | 0.0902 | 1.5306    | 1.5119    | 1.5378    | 1.575     | 1.6276    | 1.6812    | 1.7428    | 1.8372    | 1.6305  |
|                      | RF    | 0.037  | 1.4403    | 1.2665    | 1.1492    | 1.0658    | 1.0002    | 0.9555    | 0.9539    | 0.9485    | 1.0975  |
| MG-132               | FRF   | 0.0259 | 1.3522    | 1.2051    | 1.0999    | 1.0149    | 0.9546    | 0.9054    | 0.8954    | 0.9097    | 1.0422  |
|                      | RF    | 0.1246 | 1.6207    | 1.6688    | 1.7445    | 1.783     | 1.8549    | 1.9289    | 2.0313    | 2.1509    | 1.8479  |
| Paclitaxel           | FRF   | 0.107  | 1.6062    | 1.6479    | 1.6968    | 1.7541    | 1.8117    | 1.8794    | 1.9619    | 2.0857    | 1.8055  |
|                      | RF    | 0.1427 | 1.8698    | 1.8716    | 1.8982    | 1.947     | 1.9976    | 2.0908    | 2.1783    | 2.3253    | 2.0223  |
| Cyclopamine          | FRF   | 0.1435 | 1.7694    | 1.763     | 1.8013    | 1.8616    | 1.9243    | 2.0036    | 2.1211    | 2.2762    | 1.9401  |
|                      | RF    | 0.0315 | 1.3288    | 1.2346    | 1.188     | 1.1736    | 1.155     | 1.1749    | 1.2055    | 1.2627    | 1.2154  |
| AZ628                | FRF   | 0.0274 | 1.34      | 1.2443    | 1.1874    | 1.1624    | 1.1541    | 1.1556    | 1.1646    | 1.2096    | 1.2022  |
|                      | RF    | 0.133  | 2.5134    | 2.1669    | 1.9748    | 1.8824    | 1.823     | 1.8044    | 1.8521    | 1.9362    | 1.9942  |
| Sorafenib            | FRF   | 0.1203 | 2.446     | 2.1155    | 1.9411    | 1.8337    | 1.7714    | 1.7544    | 1.7966    | 1.8978    | 1.9446  |
|                      | RF    | 0.0766 | 1.5314    | 1.4777    | 1.4452    | 1.4407    | 1.4627    | 1.4575    | 1.4845    | 1.532     | 1.4789  |
| VX-680               | FRF   | 0.0662 | 1.5193    | 1.4681    | 1.4438    | 1.4394    | 1.4388    | 1.4417    | 1.4622    | 1.5037    | 1.4646  |
|                      | RF    | 0.128  | 2.5637    | 2.3388    | 2.2608    | 2.1607    | 2.1121    | 2.0611    | 2.0323    | 2.0098    | 2.1924  |
| Imatinib             | FRF   | 0.12   | 2.526     | 2.3258    | 2.2177    | 2.1569    | 2.0957    | 2.0445    | 2.0051    | 1.9705    | 2.1678  |
|                      | RF    | 0.0383 | 1.2762    | 1.1374    | 1.07      | 0.9765    | 0.9454    | 0.9043    | 0.872     | 0.8502    | 1.004   |
| NVP-TAE684           | FRF   | 0.0258 | 1.1553    | 1.0502    | 0.9733    | 0.9056    | 0.8562    | 0.8255    | 0.8       | 0.7784    | 0.9181  |
|                      | RF    | 0.1156 | 1.7224    | 1.6634    | 1.6829    | 1.7587    | 1.8194    | 1.8944    | 2.0052    | 2.1901    | 1.8421  |
| PF-02341066          | FRF   | 0.111  | 1.7162    | 1.656     | 1.673     | 1.7253    | 1.795     | 1.8872    | 2.0037    | 2.1722    | 1.8286  |
|                      | RF    | 0.0475 | 1.2559    | 1.1949    | 1.1595    | 1.1705    | 1.1532    | 1.1884    | 1.1808    | 1.1968    | 1.1875  |
| AZD-0530             | FRF   | 0.0364 | 1.2281    | 1.1682    | 1.1354    | 1.1268    | 1.1234    | 1.125     | 1.1286    | 1.1339    | 1.1462  |
|                      | RF    | 0.0661 | 1.7654    | 1.6408    | 1.5783    | 1.5453    | 1.5295    | 1.5384    | 1.5438    | 1.5804    | 1.5902  |
| S-Triptyl-L-cysteine | FRF   | 0.0543 | 1.7413    | 1.6184    | 1.5425    | 1.494     | 1.4786    | 1.4608    | 1.4598    | 1.4899    | 1.5357  |
|                      | RF    | 0.0844 | 1.3216    | 1.3881    | 1.4569    | 1.5297    | 1.6323    | 1.7073    | 1.8311    | 1.9878    | 1.6069  |
| Z-LLNle-CHO          | FRF   | 0.0857 | 1.2496    | 1.2909    | 1.3527    | 1.4335    | 1.5304    | 1.6421    | 1.7723    | 1.9423    | 1.5267  |
|                      | RF    | 0.0821 | 1.1943    | 1.2622    | 1.3096    | 1.3575    | 1.419     | 1.506     | 1.5874    | 1.7042    | 1.4175  |
| Dasatinib            | FRF   | 0.0776 | 1.2078    | 1.2557    | 1.3103    | 1.3656    | 1.4311    | 1.498     | 1.5824    | 1.7033    | 1.4193  |
|                      | RF    | 0.1706 | 3.5646    | 3.0769    | 2.8374    | 2.7091    | 2.6161    | 2.5967    | 2.6919    | 2.8865    | 2.8724  |
| GNF-2                | FRF   | 0.1533 | 3.4158    | 2.8774    | 2.5761    | 2.4423    | 2.3922    | 2.4175    | 2.5577    | 2.8209    | 2.6875  |
|                      | RF    | 0.0288 | 1.1946    | 1.0841    | 1.0022    | 0.9293    | 0.8772    | 0.805     | 0.7644    | 0.726     | 0.9229  |
| CGP-60474            | FRF   | 0.0194 | 1.1075    | 1.0125    | 0.9392    | 0.8756    | 0.815     | 0.7561    | 0.7052    | 0.6711    | 0.8603  |
|                      | RF    | 0.1135 | 1.0519    | 1.1472    | 1.2349    | 1.3366    | 1.4259    | 1.5384    | 1.637     | 1.8148    | 1.3983  |
| CGP-082996           | FRF   | 0.11   | 1.037     | 1.1013    | 1.176     | 1.2478    | 1.3304    | 1.4262    | 1.5422    | 1.6967    | 1.3197  |
|                      | RF    | 0.0499 | 1.3682    | 1.2746    | 1.2494    | 1.2615    | 1.2897    | 1.3178    | 1.3822    | 1.4746    | 1.3273  |
| A-770041             | FRF   | 0.0483 | 1.3642    | 1.2538    | 1.2258    | 1.2308    | 1.2492    | 1.2857    | 1.3428    | 1.4244    | 1.2971  |
|                      | RF    | 0.1158 | 2.3238    | 2.0588    | 1.9727    | 1.9075    | 1.9085    | 1.9381    | 1.9732    | 2.0792    | 2.0202  |
| WH-4-023             | FRF   | 0.1057 | 2.3063    | 2.0748    | 1.961     | 1.8997    | 1.8858    | 1.9116    | 1.9702    | 2.0925    | 2.0127  |
|                      | RF    | 0.1482 | 3.4064    | 2.961     | 2.6643    | 2.5482    | 2.3909    | 2.325     | 2.2569    | 2.2913    | 2.6055  |
| WZ-1-84              | FRF   | 0.1328 | 3.2713    | 2.8204    | 2.5265    | 2.3121    | 2.2125    | 2.153     | 2.1514    | 2.2259    | 2.4591  |
|                      | RF    | 0.0514 | 1.4484    | 1.3295    | 1.2695    | 1.2642    | 1.264     | 1.2992    | 1.3357    | 1.3759    | 1.3233  |
| BI-2536              | FRF   | 0.0459 | 1.4604    | 1.3367    | 1.2716    | 1.2381    | 1.2306    | 1.2573    | 1.3035    | 1.3701    | 1.3085  |
|                      | RF    | 0.1117 | 1.4583    | 1.5436    | 1.5907    | 1.6808    | 1.7689    | 1.8626    | 1.9685    | 2.1153    | 1.7486  |
| BMS-536924           | FRF   | 0.1116 | 1.3783    | 1.4435    | 1.5221    | 1.6042    | 1.6938    | 1.7954    | 1.9141    | 2.0728    | 1.678   |
|                      | RF    | 0.1267 | 2.0026    | 1.8233    | 1.7752    | 1.8229    | 1.8784    | 1.9658    | 2.0645    | 2.2417    | 1.9468  |
| BMS-509744           | FRF   | 0.1229 | 1.9668    | 1.805     | 1.7773    | 1.8113    | 1.8687    | 1.9507    | 2.0696    | 2.2405    | 1.9362  |
|                      | RF    | 0.061  | 1.1916    | 1.1434    | 1.1819    | 1.2403    | 1.3262    | 1.4328    | 1.5584    | 1.7181    | 1.3491  |
| CMK                  | FRF   | 0.0598 | 1.1735    | 1.1189    | 1.1543    | 1.2289    | 1.3097    | 1.4059    | 1.5275    | 1.6834    | 1.3253  |
|                      | RF    | 0.0542 | 1.2626    | 1.2502    | 1.2695    | 1.2988    | 1.3715    | 1.4291    | 1.5457    | 1.6627    | 1.3863  |
| Pyrimethamine        | FRF   | 0.052  | 1.2608    | 1.2323    | 1.2579    | 1.2972    | 1.3541    | 1.4314    | 1.53      | 1.6566    | 1.3775  |
|                      | RF    | 0.1023 | 1.8621    | 1.7736    | 1.7716    | 1.7731    | 1.8369    | 1.8816    | 1.9761    | 2.1094    | 1.8731  |
|                      | FRF   | 0.0977 | 1.8691    | 1.7703    | 1.7436    | 1.7442    | 1.7803    | 1.8403    | 1.927     | 2.0521    | 1.8409  |

Table S2: Mean Absolute Error (MAE) between actual and predicted drug sensitivities ( $AUC$  and different  $IC$ 's) for 2 methods; RF and FRF. In FRF, node cost is calculated using 8  $IC$  regions. Here, results of all 140 drugs of GDSC database  $v5$  are shown.

| Drug Name    | Model | $AUC$  | $IC_{10}$ | $IC_{20}$ | $IC_{30}$ | $IC_{40}$ | $IC_{50}$ | $IC_{60}$ | $IC_{70}$ | $IC_{80}$ | Average |
|--------------|-------|--------|-----------|-----------|-----------|-----------|-----------|-----------|-----------|-----------|---------|
| JW-7-52-1    | RF    | 0.1656 | 1.7563    | 1.7574    | 1.8373    | 1.9039    | 2.0276    | 2.1625    | 2.331     | 2.6052    | 2.0476  |
|              | FRF   | 0.1624 | 1.7331    | 1.6977    | 1.7539    | 1.828     | 1.9207    | 2.0476    | 2.2316    | 2.5101    | 1.9654  |
| A-443654     | RF    | 0.1041 | 1.1877    | 1.2548    | 1.3428    | 1.4252    | 1.525     | 1.6264    | 1.7499    | 1.9333    | 1.5056  |
|              | FRF   | 0.1098 | 1.1481    | 1.2038    | 1.2673    | 1.3345    | 1.4148    | 1.5074    | 1.6219    | 1.7743    | 1.409   |
| GW843682X    | RF    | 0.1313 | 1.4825    | 1.5624    | 1.6745    | 1.8111    | 1.9213    | 2.0503    | 2.2123    | 2.4399    | 1.8943  |
|              | FRF   | 0.1282 | 1.3539    | 1.4181    | 1.5279    | 1.6495    | 1.7819    | 1.9227    | 2.0874    | 2.305     | 1.7558  |
| MS-275       | RF    | 0.1071 | 1.4331    | 1.3756    | 1.4381    | 1.5353    | 1.6439    | 1.8035    | 1.9861    | 2.2498    | 1.6832  |
|              | FRF   | 0.1101 | 1.4131    | 1.3375    | 1.3661    | 1.4284    | 1.5403    | 1.687     | 1.8716    | 2.1332    | 1.5971  |
| Parthenolide | RF    | 0.0292 | 1.3288    | 1.3005    | 1.2851    | 1.2953    | 1.3239    | 1.3206    | 1.3652    | 1.4048    | 1.328   |
|              | FRF   | 0.0252 | 1.3231    | 1.2926    | 1.2821    | 1.2779    | 1.2901    | 1.3136    | 1.346     | 1.389     | 1.3143  |
| KIN001-135   | RF    | 0.0109 | 0.9776    | 0.8199    | 0.7239    | 0.6385    | 0.5848    | 0.5464    | 0.5196    | 0.516     | 0.6658  |
|              | FRF   | 0.0084 | 0.9109    | 0.7773    | 0.6848    | 0.6167    | 0.5716    | 0.5382    | 0.5178    | 0.5215    | 0.6424  |
| TGX221       | RF    | 0.0423 | 2.1298    | 1.7658    | 1.5722    | 1.409     | 1.2886    | 1.206     | 1.1504    | 1.1496    | 1.4589  |
|              | FRF   | 0.0373 | 2.0421    | 1.7232    | 1.499     | 1.3511    | 1.2383    | 1.1534    | 1.1117    | 1.1188    | 1.4047  |
| Bortezomib   | RF    | 0.1612 | 1.1812    | 1.2946    | 1.4282    | 1.551     | 1.6545    | 1.7758    | 1.9099    | 2.0991    | 1.6118  |
|              | FRF   | 0.1573 | 1.1741    | 1.2949    | 1.4047    | 1.5082    | 1.6134    | 1.7261    | 1.8537    | 2.0156    | 1.5738  |
| XMD8-85      | RF    | 0.061  | 1.2746    | 1.2539    | 1.2722    | 1.3208    | 1.3816    | 1.4359    | 1.5091    | 1.6198    | 1.3835  |
|              | FRF   | 0.0612 | 1.2595    | 1.2201    | 1.2349    | 1.2819    | 1.3317    | 1.3892    | 1.4667    | 1.5738    | 1.3447  |
| Roscovitine  | RF    | 0.0323 | 1.2444    | 1.2559    | 1.2824    | 1.3096    | 1.3652    | 1.4049    | 1.4788    | 1.5651    | 1.3633  |
|              | FRF   | 0.0359 | 1.2161    | 1.2168    | 1.2533    | 1.2978    | 1.3431    | 1.3985    | 1.4652    | 1.5597    | 1.3438  |
| Salubrinal   | RF    | 0.0412 | 1.1609    | 1.1683    | 1.2238    | 1.2452    | 1.3132    | 1.3688    | 1.4493    | 1.5688    | 1.3123  |
|              | FRF   | 0.0453 | 1.1214    | 1.0955    | 1.141     | 1.1998    | 1.2623    | 1.3363    | 1.4309    | 1.5557    | 1.2679  |
| Lapatinib    | RF    | 0.035  | 1.6051    | 1.438     | 1.3449    | 1.2572    | 1.1899    | 1.1476    | 1.1089    | 1.098     | 1.2737  |
|              | FRF   | 0.0286 | 1.5788    | 1.4157    | 1.3059    | 1.2172    | 1.143     | 1.089     | 1.0585    | 1.0568    | 1.2331  |
| GSK269962A   | RF    | 0.0607 | 2.4652    | 2.0184    | 1.8144    | 1.6904    | 1.65      | 1.6292    | 1.7006    | 1.8324    | 1.8501  |
|              | FRF   | 0.0605 | 2.4226    | 1.9997    | 1.7799    | 1.6436    | 1.6047    | 1.6241    | 1.6956    | 1.8423    | 1.8266  |
| Doxorubicin  | RF    | 0.146  | 1.5127    | 1.464     | 1.431     | 1.4189    | 1.4387    | 1.4453    | 1.4883    | 1.5702    | 1.4712  |
|              | FRF   | 0.1482 | 1.5085    | 1.4499    | 1.4216    | 1.4113    | 1.4209    | 1.4414    | 1.4862    | 1.5749    | 1.4643  |
| Etoposide    | RF    | 0.145  | 1.8283    | 1.7765    | 1.7773    | 1.7961    | 1.8403    | 1.8841    | 1.9478    | 2.0716    | 1.8653  |
|              | FRF   | 0.1431 | 1.8283    | 1.7641    | 1.7639    | 1.782     | 1.8172    | 1.8627    | 1.9266    | 2.0524    | 1.8496  |
| Gemcitabine  | RF    | 0.1459 | 3.9367    | 3.4848    | 3.2466    | 3.0895    | 3.0124    | 2.9827    | 2.9557    | 3.0874    | 3.2245  |
|              | FRF   | 0.2146 | 3.896     | 3.4867    | 3.2414    | 3.0957    | 3.0027    | 2.9604    | 2.9728    | 3.0809    | 3.2171  |
| Mitomycin C  | RF    | 0.1171 | 1.9372    | 1.7892    | 1.7216    | 1.6468    | 1.5763    | 1.5434    | 1.4947    | 1.4565    | 1.6457  |
|              | FRF   | 0.166  | 1.9319    | 1.7791    | 1.6884    | 1.6264    | 1.5792    | 1.5401    | 1.5012    | 1.4665    | 1.6391  |
| Vinorelbine  | RF    | 0.1313 | 1.3498    | 1.3781    | 1.4062    | 1.4723    | 1.5399    | 1.6081    | 1.7286    | 1.8578    | 1.5426  |
|              | FRF   | 0.1311 | 1.339     | 1.3442    | 1.3768    | 1.4235    | 1.4918    | 1.575     | 1.6774    | 1.8263    | 1.5067  |
| NSC-87877    | RF    | 0.0182 | 0.9975    | 0.9346    | 0.9005    | 0.8663    | 0.8418    | 0.8251    | 0.8191    | 0.8005    | 0.8732  |
|              | FRF   | 0.0143 | 0.9655    | 0.8984    | 0.8544    | 0.8233    | 0.7978    | 0.7762    | 0.7607    | 0.7475    | 0.828   |
| Bicalutamide | RF    | 0.0043 | 0.5256    | 0.4937    | 0.4716    | 0.448     | 0.4318    | 0.4067    | 0.3866    | 0.3649    | 0.4411  |
|              | FRF   | 0.0034 | 0.5043    | 0.4732    | 0.4495    | 0.429     | 0.4099    | 0.3916    | 0.372     | 0.3497    | 0.4224  |
| QS11         | RF    | 0.0659 | 1.5704    | 1.5348    | 1.5367    | 1.5418    | 1.5611    | 1.5827    | 1.6017    | 1.6525    | 1.5727  |
|              | FRF   | 0.0657 | 1.5393    | 1.5121    | 1.5097    | 1.5186    | 1.5372    | 1.562     | 1.5936    | 1.641     | 1.5517  |
| Midostaurin  | RF    | 0.059  | 1.3132    | 1.3397    | 1.3573    | 1.3883    | 1.4276    | 1.4713    | 1.5155    | 1.594     | 1.4259  |
|              | FRF   | 0.0579 | 1.2857    | 1.3034    | 1.3379    | 1.3728    | 1.4107    | 1.4553    | 1.5075    | 1.5754    | 1.4061  |
| CHIR-99021   | RF    | 0.0275 | 1.3387    | 1.2564    | 1.1942    | 1.1607    | 1.1124    | 1.0686    | 1.0328    | 0.9916    | 1.1444  |
|              | FRF   | 0.0214 | 1.2826    | 1.2084    | 1.1523    | 1.104     | 1.0614    | 1.0224    | 0.9842    | 0.9374    | 1.0941  |
| AP-24534     | RF    | 0.0598 | 1.8811    | 1.7809    | 1.7523    | 1.7353    | 1.734     | 1.7353    | 1.7346    | 1.7877    | 1.7677  |
|              | FRF   | 0.0533 | 1.8183    | 1.7588    | 1.7281    | 1.7159    | 1.7161    | 1.7172    | 1.7198    | 1.7526    | 1.7409  |
| AZD6482      | RF    | 0.0638 | 1.9669    | 1.706     | 1.5726    | 1.4941    | 1.4239    | 1.3791    | 1.3598    | 1.3879    | 1.5363  |
|              | FRF   | 0.062  | 1.9497    | 1.7093    | 1.5707    | 1.4812    | 1.419     | 1.3785    | 1.3618    | 1.3913    | 1.5327  |
| JNK-9L       | RF    | 0.1081 | 0.9043    | 0.8835    | 0.8868    | 0.9125    | 0.9576    | 1.0019    | 1.0787    | 1.1741    | 0.9749  |
|              | FRF   | 0.1117 | 0.9105    | 0.8647    | 0.8666    | 0.8872    | 0.9211    | 0.965     | 1.0291    | 1.1202    | 0.9456  |
| PF-562271    | RF    | 0.0412 | 1.2589    | 1.209     | 1.1953    | 1.1869    | 1.2109    | 1.2469    | 1.2855    | 1.3578    | 1.2439  |

Table S2: Mean Absolute Error (MAE) between actual and predicted drug sensitivities ( $AUC$  and different  $IC$ 's) for 2 methods; RF and FRF. In FRF, node cost is calculated using 8  $IC$  regions. Here, results of all 140 drugs of GDSC database  $v5$  are shown.

| Drug Name          | Model | $AUC$  | $IC_{10}$ | $IC_{20}$ | $IC_{30}$ | $IC_{40}$ | $IC_{50}$ | $IC_{60}$ | $IC_{70}$ | $IC_{80}$ | Average |
|--------------------|-------|--------|-----------|-----------|-----------|-----------|-----------|-----------|-----------|-----------|---------|
| DMOG               | FRF   | 0.0424 | 1.2454    | 1.1901    | 1.1721    | 1.1719    | 1.1927    | 1.2285    | 1.2812    | 1.356     | 1.2297  |
|                    | RF    | 0.1312 | 1.282     | 1.2228    | 1.2297    | 1.2427    | 1.2814    | 1.3371    | 1.4255    | 1.5572    | 1.3223  |
|                    | FRF   | 0.133  | 1.3027    | 1.2391    | 1.2319    | 1.2473    | 1.2736    | 1.323     | 1.4053    | 1.5426    | 1.3207  |
| FTI-277            | RF    | 0.017  | 0.9804    | 0.9174    | 0.8753    | 0.838     | 0.8089    | 0.7695    | 0.7407    | 0.721     | 0.8314  |
|                    | FRF   | 0.0145 | 0.9717    | 0.9137    | 0.8681    | 0.8288    | 0.7917    | 0.7599    | 0.7315    | 0.701     | 0.8208  |
| OSU-03012          | RF    | 0.1211 | 1.5365    | 1.5877    | 1.6314    | 1.6724    | 1.7218    | 1.774     | 1.8417    | 1.9437    | 1.7136  |
|                    | FRF   | 0.1179 | 1.4924    | 1.5354    | 1.5826    | 1.6361    | 1.6905    | 1.7535    | 1.8317    | 1.9336    | 1.682   |
| Shikonin           | RF    | 0.1557 | 1.2026    | 1.2308    | 1.2686    | 1.312     | 1.3616    | 1.3992    | 1.4636    | 1.5541    | 1.3491  |
|                    | FRF   | 0.1529 | 1.1958    | 1.2223    | 1.247     | 1.2749    | 1.3038    | 1.3369    | 1.3785    | 1.4357    | 1.2994  |
| AKT inhibitor VIII | RF    | 0.0424 | 1.44      | 1.345     | 1.2913    | 1.2431    | 1.2194    | 1.1865    | 1.1679    | 1.1553    | 1.2561  |
|                    | FRF   | 0.0417 | 1.453     | 1.3522    | 1.2966    | 1.2561    | 1.2208    | 1.1905    | 1.1667    | 1.1553    | 1.2614  |
| Embelin            | RF    | 0.0798 | 0.8046    | 0.8379    | 0.8703    | 0.9357    | 0.9864    | 1.0594    | 1.1543    | 1.2867    | 0.9919  |
|                    | FRF   | 0.0834 | 0.7968    | 0.8114    | 0.8484    | 0.8979    | 0.9553    | 1.0227    | 1.1102    | 1.2364    | 0.9599  |
| FH535              | RF    | 0.0993 | 1.0428    | 0.951     | 0.9502    | 0.9915    | 1.0625    | 1.1634    | 1.3185    | 1.519     | 1.1249  |
|                    | FRF   | 0.1035 | 1.041     | 0.9551    | 0.9405    | 0.976     | 1.043     | 1.1383    | 1.2634    | 1.4528    | 1.1012  |
| PAC-1              | RF    | 0.0419 | 1.279     | 1.2928    | 1.3061    | 1.3224    | 1.3504    | 1.3731    | 1.4113    | 1.4787    | 1.3517  |
|                    | FRF   | 0.0374 | 1.2726    | 1.2758    | 1.2896    | 1.3037    | 1.3209    | 1.3453    | 1.3737    | 1.4199    | 1.3252  |
| IPA-3              | RF    | 0.0718 | 1.4249    | 1.493     | 1.5406    | 1.5882    | 1.633     | 1.6929    | 1.7499    | 1.8335    | 1.6195  |
|                    | FRF   | 0.062  | 1.4351    | 1.4978    | 1.5429    | 1.5839    | 1.6248    | 1.6678    | 1.7185    | 1.7867    | 1.6072  |
| GSK-650394         | RF    | 0.083  | 1.9389    | 1.8127    | 1.7379    | 1.6825    | 1.6365    | 1.6407    | 1.6421    | 1.6717    | 1.7204  |
|                    | FRF   | 0.0821 | 1.9194    | 1.7913    | 1.7168    | 1.6742    | 1.6502    | 1.643     | 1.652     | 1.6793    | 1.7158  |
| BAY 61-3606        | RF    | 0.0847 | 1.4156    | 1.3745    | 1.3676    | 1.3639    | 1.3851    | 1.4141    | 1.4754    | 1.5352    | 1.4164  |
|                    | FRF   | 0.084  | 1.3702    | 1.3379    | 1.3305    | 1.3458    | 1.3714    | 1.4056    | 1.4533    | 1.5239    | 1.3923  |
| Thapsigargin       | RF    | 0.1443 | 2.4606    | 2.2228    | 2.125     | 2.1017    | 2.1009    | 2.1735    | 2.3333    | 2.5558    | 2.2592  |
|                    | FRF   | 0.2006 | 2.4415    | 2.2248    | 2.1392    | 2.099     | 2.1106    | 2.167     | 2.2942    | 2.5073    | 2.2479  |
| Obatoclox Mesylate | RF    | 0.1403 | 2.1192    | 1.8568    | 1.726     | 1.6432    | 1.6261    | 1.6296    | 1.6731    | 1.7857    | 1.7575  |
|                    | FRF   | 0.1898 | 2.0813    | 1.8454    | 1.7201    | 1.6484    | 1.6151    | 1.6267    | 1.6781    | 1.7878    | 1.7503  |
| BMS-754807         | RF    | 0.095  | 2.2446    | 1.9272    | 1.7603    | 1.6571    | 1.6255    | 1.6202    | 1.6669    | 1.7564    | 1.7823  |
|                    | FRF   | 0.0949 | 2.1717    | 1.9078    | 1.7596    | 1.6652    | 1.613     | 1.6063    | 1.6544    | 1.7682    | 1.7683  |
| OSI-906            | RF    | 0.0694 | 2.1853    | 1.9067    | 1.7479    | 1.6237    | 1.5188    | 1.4414    | 1.341     | 1.3061    | 1.6339  |
|                    | FRF   | 0.0644 | 2.166     | 1.9151    | 1.7471    | 1.6167    | 1.5058    | 1.4085    | 1.3314    | 1.2881    | 1.6223  |
| Bexarotene         | RF    | 0.0379 | 1.6856    | 1.4569    | 1.3395    | 1.2513    | 1.1976    | 1.2045    | 1.2582    | 1.3605    | 1.3443  |
|                    | FRF   | 0.0384 | 1.6478    | 1.4519    | 1.337     | 1.2485    | 1.2035    | 1.2111    | 1.2655    | 1.3683    | 1.3417  |
| Bleomycin          | RF    | 0.1465 | 2.8279    | 2.6156    | 2.485     | 2.4248    | 2.3984    | 2.4       | 2.4083    | 2.5034    | 2.5079  |
|                    | FRF   | 0.1869 | 2.7953    | 2.5831    | 2.4724    | 2.4019    | 2.371     | 2.3788    | 2.4123    | 2.5022    | 2.4896  |
| LFM-A13            | RF    | 0.0202 | 1.1245    | 0.9644    | 0.8699    | 0.804     | 0.758     | 0.7283    | 0.7126    | 0.7228    | 0.8356  |
|                    | FRF   | 0.0184 | 1.1058    | 0.9607    | 0.8679    | 0.8057    | 0.7607    | 0.7251    | 0.7052    | 0.7068    | 0.8298  |
| AUY922             | RF    | 0.1312 | 1.1848    | 1.2117    | 1.2561    | 1.2907    | 1.3405    | 1.3907    | 1.4608    | 1.5617    | 1.3371  |
|                    | FRF   | 0.1297 | 1.1737    | 1.1872    | 1.2198    | 1.2552    | 1.2975    | 1.3482    | 1.4148    | 1.5174    | 1.3017  |
| Bryostatin 1       | RF    | 0.0241 | 1.2331    | 1.1275    | 1.0628    | 0.9986    | 0.9394    | 0.888     | 0.8339    | 0.7944    | 0.9847  |
|                    | FRF   | 0.0204 | 1.215     | 1.1204    | 1.0495    | 0.9872    | 0.9293    | 0.873     | 0.8234    | 0.7719    | 0.9712  |
| Pazopanib          | RF    | 0.0561 | 1.5966    | 1.4852    | 1.4074    | 1.3737    | 1.3422    | 1.3316    | 1.3162    | 1.3093    | 1.3953  |
|                    | FRF   | 0.0534 | 1.5933    | 1.4671    | 1.4006    | 1.3512    | 1.3164    | 1.2917    | 1.2792    | 1.2772    | 1.3721  |
| LAQ824             | RF    | 0.1171 | 1.0134    | 0.9509    | 0.9358    | 0.9405    | 0.9547    | 0.984     | 1.0351    | 1.1238    | 0.9923  |
|                    | FRF   | 0.119  | 1.0096    | 0.9521    | 0.9311    | 0.9295    | 0.9428    | 0.9638    | 1.0025    | 1.0748    | 0.9758  |
| Epothilone B       | RF    | 0.1433 | 1.6792    | 1.636     | 1.6373    | 1.659     | 1.7077    | 1.737     | 1.812     | 1.9295    | 1.7247  |
|                    | FRF   | 0.1451 | 1.676     | 1.6324    | 1.6309    | 1.6429    | 1.6752    | 1.7219    | 1.7882    | 1.904     | 1.7089  |
| GSK-1904529A       | RF    | 0.014  | 0.9711    | 0.9024    | 0.855     | 0.8122    | 0.7676    | 0.7378    | 0.6971    | 0.6607    | 0.8005  |
|                    | FRF   | 0.0116 | 0.9495    | 0.8884    | 0.8393    | 0.7958    | 0.7546    | 0.7192    | 0.6828    | 0.6416    | 0.7839  |
| Tipifarnib         | RF    | 0.1036 | 2.2791    | 1.8959    | 1.7326    | 1.6667    | 1.657     | 1.7012    | 1.8276    | 2.0671    | 1.8534  |
|                    | FRF   | 0.1211 | 2.2918    | 1.9192    | 1.7418    | 1.6617    | 1.6534    | 1.698     | 1.8189    | 2.0461    | 1.8539  |
| AS601245           | RF    | 0.0666 | 1.3894    | 1.3622    | 1.383     | 1.3969    | 1.4299    | 1.4694    | 1.5341    | 1.6179    | 1.4478  |
|                    | FRF   | 0.0666 | 1.36      | 1.3358    | 1.3415    | 1.363     | 1.3979    | 1.4462    | 1.5136    | 1.6098    | 1.421   |

Table S2: Mean Absolute Error (MAE) between actual and predicted drug sensitivities ( $AUC$  and different  $IC$ 's) for 2 methods; RF and FRF. In FRF, node cost is calculated using 8  $IC$  regions. Here, results of all 140 drugs of GDSC database  $v5$  are shown.

| Drug Name     | Model | $AUC$  | $IC_{10}$ | $IC_{20}$ | $IC_{30}$ | $IC_{40}$ | $IC_{50}$ | $IC_{60}$ | $IC_{70}$ | $IC_{80}$ | Average |
|---------------|-------|--------|-----------|-----------|-----------|-----------|-----------|-----------|-----------|-----------|---------|
| AICAR         | RF    | 0.0639 | 1.0269    | 1.0315    | 1.0612    | 1.0972    | 1.1428    | 1.1881    | 1.2393    | 1.3417    | 1.1411  |
|               | FRF   | 0.0668 | 1.032     | 1.0296    | 1.0486    | 1.077     | 1.1155    | 1.1654    | 1.2304    | 1.3265    | 1.1281  |
| Camptothecin  | RF    | 0.1269 | 1.5973    | 1.5151    | 1.5145    | 1.5219    | 1.5673    | 1.6265    | 1.6957    | 1.8158    | 1.6067  |
|               | FRF   | NaN    | 1.6203    | 1.5256    | 1.5084    | 1.5273    | 1.5692    | 1.6261    | 1.7031    | 1.8225    | 1.6128  |
| Vinblastine   | RF    | 0.1117 | 1.3215    | 1.2419    | 1.2199    | 1.2175    | 1.2354    | 1.2892    | 1.3667    | 1.4953    | 1.2984  |
|               | FRF   | 0.12   | 1.3417    | 1.2558    | 1.2267    | 1.2257    | 1.2415    | 1.2834    | 1.3566    | 1.4724    | 1.3005  |
| Cisplatin     | RF    | 0.0592 | 1.1523    | 1.1402    | 1.1525    | 1.1805    | 1.2153    | 1.255     | 1.3148    | 1.3796    | 1.2238  |
|               | FRF   | 0.0607 | 1.1455    | 1.1276    | 1.1393    | 1.1709    | 1.2068    | 1.2511    | 1.3039    | 1.3755    | 1.2151  |
| Cytarabine    | RF    | 0.0991 | 1.7843    | 1.6124    | 1.5181    | 1.4816    | 1.4744    | 1.5027    | 1.5626    | 1.6881    | 1.578   |
|               | FRF   | 0.1005 | 1.7876    | 1.61      | 1.5156    | 1.4714    | 1.4611    | 1.4841    | 1.5435    | 1.6621    | 1.5669  |
| Docetaxel     | RF    | 0.0952 | 1.4072    | 1.333     | 1.295     | 1.2839    | 1.2871    | 1.3209    | 1.3588    | 1.4814    | 1.3459  |
|               | FRF   | 0.0963 | 1.4254    | 1.3339    | 1.2861    | 1.2713    | 1.2738    | 1.3038    | 1.3626    | 1.4675    | 1.3406  |
| Methotrexate  | RF    | 0.0677 | 1.6933    | 1.6202    | 1.5865    | 1.5476    | 1.5207    | 1.4989    | 1.4832    | 1.4829    | 1.5542  |
|               | FRF   | 0.0582 | 1.6171    | 1.5491    | 1.5046    | 1.4724    | 1.4463    | 1.4331    | 1.4225    | 1.418     | 1.4829  |
| ATRA          | RF    | 0.0403 | 2.1161    | 1.7504    | 1.5301    | 1.3344    | 1.1747    | 1.0602    | 1.0062    | 1.0221    | 1.3743  |
|               | FRF   | 0.0372 | 1.9996    | 1.6972    | 1.49      | 1.3105    | 1.1537    | 1.0337    | 0.9826    | 1.0161    | 1.3354  |
| Gefitinib     | RF    | 0.0314 | 1.3019    | 1.1917    | 1.1168    | 1.0529    | 0.9942    | 0.9415    | 0.8987    | 0.8856    | 1.0479  |
|               | FRF   | 0.0262 | 1.2569    | 1.1625    | 1.0939    | 1.0359    | 0.9824    | 0.9296    | 0.8841    | 0.8653    | 1.0263  |
| ABT-263       | RF    | 0.087  | 1.752     | 1.6846    | 1.6421    | 1.6277    | 1.6268    | 1.6465    | 1.6753    | 1.7377    | 1.6741  |
|               | FRF   | 0.081  | 1.7347    | 1.6664    | 1.6356    | 1.6158    | 1.6015    | 1.6059    | 1.6261    | 1.6819    | 1.646   |
| Vorinostat    | RF    | 0.0868 | 0.7416    | 0.7226    | 0.7217    | 0.7418    | 0.7701    | 0.8043    | 0.8558    | 0.9407    | 0.7873  |
|               | FRF   | 0.0938 | 0.7441    | 0.7183    | 0.7217    | 0.7374    | 0.7612    | 0.7935    | 0.8382    | 0.9116    | 0.7782  |
| Nilotinib     | RF    | 0.0272 | 1.2416    | 1.2039    | 1.176     | 1.1554    | 1.1211    | 1.0933    | 1.0651    | 1.0384    | 1.1369  |
|               | FRF   | 0.0214 | 1.1982    | 1.1573    | 1.1257    | 1.0969    | 1.0686    | 1.0399    | 1.0093    | 0.9726    | 1.0835  |
| RDEA119       | RF    | 0.0915 | 2.0818    | 1.8439    | 1.7375    | 1.6584    | 1.6133    | 1.5826    | 1.5932    | 1.6336    | 1.718   |
|               | FRF   | 0.0872 | 2.0382    | 1.8271    | 1.6984    | 1.6085    | 1.5616    | 1.5375    | 1.5337    | 1.5507    | 1.6694  |
| CI-1040       | RF    | 0.0801 | 1.7216    | 1.5116    | 1.3926    | 1.3309    | 1.2916    | 1.2795    | 1.3112    | 1.3987    | 1.4047  |
|               | FRF   | 0.0791 | 1.6772    | 1.4861    | 1.3904    | 1.3296    | 1.2948    | 1.2845    | 1.313     | 1.3826    | 1.3948  |
| Temsirrolimus | RF    | 0.0605 | 3.107     | 2.4579    | 2.0394    | 1.7022    | 1.4974    | 1.4061    | 1.4458    | 1.6783    | 1.9168  |
|               | FRF   | 0.1137 | 3.0387    | 2.3981    | 1.9973    | 1.7073    | 1.5012    | 1.4104    | 1.4452    | 1.6829    | 1.8976  |
| AZD-2281      | RF    | 0.028  | 1.1966    | 1.1539    | 1.1184    | 1.0839    | 1.07      | 1.0567    | 1.036     | 1.0143    | 1.0912  |
|               | FRF   | 0.023  | 1.1603    | 1.1175    | 1.0858    | 1.0572    | 1.0343    | 1.0155    | 0.9952    | 0.9727    | 1.0548  |
| ABT-888       | RF    | 0.0144 | 0.9447    | 0.8848    | 0.8447    | 0.7993    | 0.7594    | 0.719     | 0.685     | 0.6296    | 0.7833  |
|               | FRF   | 0.0114 | 0.8949    | 0.8407    | 0.7989    | 0.7613    | 0.7255    | 0.6888    | 0.6488    | 0.6016    | 0.7451  |
| Bosutinib     | RF    | 0.0608 | 1.588     | 1.5523    | 1.5198    | 1.506     | 1.4876    | 1.4802    | 1.4847    | 1.4832    | 1.5127  |
|               | FRF   | 0.0567 | 1.5754    | 1.5287    | 1.5083    | 1.4951    | 1.4841    | 1.4743    | 1.4678    | 1.4686    | 1.5003  |
| Lenalidomide  | RF    | 0.016  | 1.0052    | 0.9387    | 0.8897    | 0.8407    | 0.8038    | 0.7576    | 0.7035    | 0.6485    | 0.8235  |
|               | FRF   | 0.0129 | 0.9652    | 0.9017    | 0.8523    | 0.8085    | 0.7671    | 0.7248    | 0.6783    | 0.6235    | 0.7902  |
| Axitinib      | RF    | 0.0435 | 1.3575    | 1.3153    | 1.2879    | 1.2808    | 1.2663    | 1.2524    | 1.2651    | 1.2768    | 1.2878  |
|               | FRF   | 0.0383 | 1.3407    | 1.3041    | 1.2828    | 1.2651    | 1.251     | 1.2418    | 1.2396    | 1.2482    | 1.2717  |
| AZD7762       | RF    | 0.1047 | 1.2514    | 1.1954    | 1.1751    | 1.1599    | 1.1632    | 1.1743    | 1.2039    | 1.2718    | 1.1994  |
|               | FRF   | 0.1076 | 1.2601    | 1.2016    | 1.1752    | 1.1639    | 1.158     | 1.1645    | 1.1946    | 1.2555    | 1.1967  |
| GW 441756     | RF    | 0.0316 | 1.599     | 1.3779    | 1.2191    | 1.1016    | 0.9982    | 0.9177    | 0.8564    | 0.8428    | 1.1141  |
|               | FRF   | 0.026  | 1.5017    | 1.3113    | 1.1758    | 1.067     | 0.9759    | 0.898     | 0.8428    | 0.8363    | 1.0761  |
| CEP-701       | RF    | 0.0924 | 1.6556    | 1.4444    | 1.342     | 1.2731    | 1.2387    | 1.2494    | 1.303     | 1.4221    | 1.366   |
|               | FRF   | 0.1027 | 1.6428    | 1.4423    | 1.3325    | 1.2636    | 1.2273    | 1.2334    | 1.2889    | 1.412     | 1.3553  |
| SB 216763     | RF    | 0.0198 | 1.0793    | 1.0495    | 1.0317    | 0.9973    | 0.9823    | 0.9663    | 0.9409    | 0.9195    | 0.9958  |
|               | FRF   | 0.0164 | 1.0359    | 1.0057    | 0.9814    | 0.9585    | 0.9361    | 0.9129    | 0.888     | 0.8593    | 0.9472  |
| 17-AAG        | RF    | 0.1087 | 1.678     | 1.6017    | 1.5755    | 1.547     | 1.5519    | 1.5611    | 1.6035    | 1.671     | 1.5987  |
|               | FRF   | 0.1058 | 1.662     | 1.5823    | 1.5418    | 1.5178    | 1.5106    | 1.5166    | 1.5492    | 1.6233    | 1.5629  |
| VX-702        | RF    | 0.0182 | 1.0286    | 0.94      | 0.8731    | 0.8194    | 0.7664    | 0.7161    | 0.6633    | 0.5946    | 0.8002  |
|               | FRF   | 0.0144 | 0.9724    | 0.8959    | 0.8398    | 0.7904    | 0.7437    | 0.6956    | 0.6431    | 0.5797    | 0.7701  |
| AMG-706       | RF    | 0.0248 | 1.2973    | 1.1542    | 1.0645    | 0.9935    | 0.9026    | 0.8418    | 0.7904    | 0.7485    | 0.9741  |

Table S2: Mean Absolute Error (MAE) between actual and predicted drug sensitivities ( $AUC$  and different  $IC$ 's) for 2 methods; RF and FRF. In FRF, node cost is calculated using 8  $IC$  regions. Here, results of all 140 drugs of GDSC database  $v5$  are shown.

| Drug Name          | Model | $AUC$  | $IC_{10}$ | $IC_{20}$ | $IC_{30}$ | $IC_{40}$ | $IC_{50}$ | $IC_{60}$ | $IC_{70}$ | $IC_{80}$ | Average |
|--------------------|-------|--------|-----------|-----------|-----------|-----------|-----------|-----------|-----------|-----------|---------|
| KU-55933           | FRF   | 0.0196 | 1.2103    | 1.0937    | 1.0077    | 0.9318    | 0.862     | 0.8004    | 0.7474    | 0.7164    | 0.9212  |
|                    | RF    | 0.028  | 1.1351    | 1.1014    | 1.0778    | 1.0601    | 1.054     | 1.0355    | 1.0323    | 1.0445    | 1.0676  |
|                    | FRF   | 0.0256 | 1.1129    | 1.0832    | 1.0653    | 1.0508    | 1.0366    | 1.0265    | 1.0212    | 1.0236    | 1.0525  |
| Elesclomol         | RF    | 0.141  | 1.4571    | 1.4762    | 1.4966    | 1.5546    | 1.6021    | 1.657     | 1.7432    | 1.8698    | 1.6071  |
|                    | FRF   | 0.1409 | 1.4824    | 1.4842    | 1.5052    | 1.5333    | 1.5754    | 1.6297    | 1.7157    | 1.8372    | 1.5954  |
| BIBW2992           | RF    | 0.0455 | 1.68      | 1.4938    | 1.3805    | 1.2748    | 1.1871    | 1.0968    | 1.0267    | 0.9668    | 1.2633  |
|                    | FRF   | 0.0365 | 1.5605    | 1.3988    | 1.2878    | 1.1936    | 1.1062    | 1.0248    | 0.9605    | 0.9066    | 1.1798  |
| GDC-0449           | RF    | 0.0189 | 1.0277    | 1.005     | 0.9847    | 0.9597    | 0.9458    | 0.9244    | 0.8995    | 0.8784    | 0.9531  |
|                    | FRF   | 0.016  | 1.0153    | 0.9884    | 0.9657    | 0.9442    | 0.9233    | 0.9023    | 0.8801    | 0.8541    | 0.9342  |
| PLX4720            | RF    | 0.0483 | 1.5692    | 1.4689    | 1.4215    | 1.3678    | 1.3222    | 1.2913    | 1.2586    | 1.2538    | 1.3692  |
|                    | FRF   | 0.0414 | 1.5306    | 1.4469    | 1.3894    | 1.3402    | 1.2967    | 1.2556    | 1.2247    | 1.212     | 1.337   |
| BX-795             | RF    | 0.062  | 1.0441    | 1.0744    | 1.0978    | 1.1351    | 1.1623    | 1.2135    | 1.2705    | 1.3425    | 1.1675  |
|                    | FRF   | 0.0674 | 1.0347    | 1.0469    | 1.0758    | 1.1086    | 1.1525    | 1.2035    | 1.2639    | 1.3461    | 1.154   |
| NU-7441            | RF    | 0.0275 | 1.1714    | 1.1346    | 1.1131    | 1.0902    | 1.0786    | 1.0547    | 1.0453    | 1.0503    | 1.0923  |
|                    | FRF   | 0.0256 | 1.1641    | 1.1322    | 1.1102    | 1.0899    | 1.0707    | 1.0503    | 1.0344    | 1.0236    | 1.0844  |
| SL 0101-1          | RF    | 0.0179 | 1.1299    | 1.0358    | 0.9612    | 0.8958    | 0.8294    | 0.7733    | 0.7216    | 0.6886    | 0.8794  |
|                    | FRF   | 0.0149 | 1.0816    | 0.9956    | 0.9277    | 0.8677    | 0.8122    | 0.7566    | 0.7017    | 0.6723    | 0.8519  |
| BIRB 0796          | RF    | 0.0305 | 1.5691    | 1.3311    | 1.167     | 1.0297    | 0.9419    | 0.867     | 0.8257    | 0.8295    | 1.0701  |
|                    | FRF   | 0.025  | 1.4722    | 1.2753    | 1.132     | 1.0112    | 0.9085    | 0.8477    | 0.8105    | 0.8169    | 1.0343  |
| JNK Inhibitor VIII | RF    | 0.0171 | 1.0403    | 0.9667    | 0.8984    | 0.8515    | 0.8095    | 0.7649    | 0.7258    | 0.704     | 0.8451  |
|                    | FRF   | 0.014  | 1.0046    | 0.9326    | 0.8766    | 0.8282    | 0.7845    | 0.741     | 0.6997    | 0.6739    | 0.8176  |
| 681640             | RF    | 0.0401 | 1.3126    | 1.2982    | 1.2978    | 1.2961    | 1.3022    | 1.3173    | 1.3265    | 1.3501    | 1.3126  |
|                    | FRF   | 0.0372 | 1.3074    | 1.2959    | 1.2947    | 1.2963    | 1.3004    | 1.3045    | 1.3135    | 1.3416    | 1.3068  |
| Nutlin-3a          | RF    | 0.057  | 1.62      | 1.5644    | 1.5465    | 1.53      | 1.5188    | 1.5043    | 1.5174    | 1.5027    | 1.538   |
|                    | FRF   | 0.0482 | 1.5596    | 1.5159    | 1.4888    | 1.4653    | 1.4444    | 1.4282    | 1.4193    | 1.4194    | 1.4676  |
| PD-173074          | RF    | 0.0296 | 1.334     | 1.259     | 1.1887    | 1.14      | 1.0905    | 1.0454    | 1.0031    | 0.9451    | 1.1257  |
|                    | FRF   | 0.024  | 1.284     | 1.2063    | 1.1489    | 1.0974    | 1.0486    | 1.0029    | 0.961     | 0.9119    | 1.0826  |
| ZM-447439          | RF    | 0.0557 | 1.2916    | 1.2784    | 1.2863    | 1.2974    | 1.3067    | 1.3279    | 1.36      | 1.3987    | 1.3184  |
|                    | FRF   | 0.0583 | 1.2759    | 1.26      | 1.2642    | 1.2778    | 1.2975    | 1.324     | 1.3599    | 1.4089    | 1.3085  |
| RO-3306            | RF    | 0.0325 | 1.2577    | 1.2367    | 1.2154    | 1.1892    | 1.1659    | 1.1581    | 1.1488    | 1.1331    | 1.1881  |
|                    | FRF   | 0.0281 | 1.243     | 1.2111    | 1.1872    | 1.1656    | 1.1445    | 1.1255    | 1.1055    | 1.0845    | 1.1584  |
| MK-2206            | RF    | 0.0785 | 1.9689    | 1.7278    | 1.5932    | 1.4912    | 1.4365    | 1.4328    | 1.4115    | 1.4593    | 1.5652  |
|                    | FRF   | 0.0796 | 1.9406    | 1.7131    | 1.5751    | 1.4836    | 1.4325    | 1.4036    | 1.4055    | 1.4503    | 1.5505  |
| PD-0332991         | RF    | 0.0761 | 2.601     | 2.1638    | 1.8999    | 1.715     | 1.582     | 1.4882    | 1.4441    | 1.4905    | 1.7981  |
|                    | FRF   | 0.0794 | 2.5353    | 2.1459    | 1.894     | 1.6994    | 1.5679    | 1.4838    | 1.4526    | 1.4822    | 1.7826  |
| NVP-BEZ235         | RF    | 0.0832 | 1.1133    | 1.0286    | 1.0121    | 0.9897    | 0.9926    | 0.9951    | 1.0159    | 1.068     | 1.0269  |
|                    | FRF   | 0.0885 | 1.1155    | 1.0373    | 1.003     | 0.9856    | 0.9827    | 0.9888    | 1.0111    | 1.0685    | 1.0241  |
| GDC0941            | RF    | 0.0946 | 1.7499    | 1.6538    | 1.5902    | 1.5603    | 1.5251    | 1.509     | 1.5179    | 1.5467    | 1.5816  |
|                    | FRF   | 0.099  | 1.764     | 1.6516    | 1.5958    | 1.5593    | 1.5351    | 1.52      | 1.5238    | 1.5546    | 1.588   |
| AZD8055            | RF    | 0.0734 | 1.0321    | 0.949     | 0.9138    | 0.8951    | 0.8889    | 0.8979    | 0.9431    | 1.0052    | 0.9406  |
|                    | FRF   | 0.0791 | 1.0391    | 0.9537    | 0.9104    | 0.8902    | 0.8863    | 0.9012    | 0.9375    | 1.0096    | 0.941   |
| PD-0325901         | RF    | 0.0812 | 2.3433    | 2.0098    | 1.8288    | 1.7015    | 1.6145    | 1.5304    | 1.5044    | 1.5131    | 1.7557  |
|                    | FRF   | 0.0769 | 2.2177    | 1.9367    | 1.7638    | 1.6408    | 1.5438    | 1.4785    | 1.4531    | 1.4715    | 1.6882  |
| SB590885           | RF    | 0.0341 | 1.4614    | 1.359     | 1.3116    | 1.2473    | 1.1889    | 1.1352    | 1.1127    | 1.0636    | 1.235   |
|                    | FRF   | 0.0256 | 1.3478    | 1.2691    | 1.2125    | 1.1601    | 1.1085    | 1.0632    | 1.0268    | 0.9883    | 1.1471  |
| AZD6244            | RF    | 0.0661 | 2.1526    | 1.9101    | 1.7448    | 1.6136    | 1.5017    | 1.4053    | 1.3401    | 1.2745    | 1.6178  |
|                    | FRF   | 0.0601 | 2.1224    | 1.8862    | 1.7305    | 1.5989    | 1.4829    | 1.3849    | 1.3119    | 1.2494    | 1.5959  |
| AZD6482            | RF    | 0.0598 | 1.927     | 1.5917    | 1.4154    | 1.2863    | 1.208     | 1.167     | 1.1855    | 1.2647    | 1.3807  |
|                    | FRF   | 0.0608 | 1.9065    | 1.6129    | 1.4284    | 1.3027    | 1.2172    | 1.1689    | 1.1828    | 1.2614    | 1.3851  |
| CCT007093          | RF    | 0.0186 | 1.1204    | 0.9965    | 0.9101    | 0.8314    | 0.7611    | 0.7174    | 0.6766    | 0.6513    | 0.8331  |
|                    | FRF   | 0.0154 | 1.0653    | 0.9586    | 0.8785    | 0.8098    | 0.7475    | 0.6955    | 0.6514    | 0.6281    | 0.8043  |
| EHT 1864           | RF    | 0.0319 | 1.106     | 1.0437    | 1.013     | 0.9898    | 0.986     | 0.9899    | 0.9992    | 1.0379    | 1.0207  |
|                    | FRF   | 0.0361 | 1.0963    | 1.0257    | 0.9957    | 0.9764    | 0.9726    | 0.9781    | 0.9965    | 1.0298    | 1.0089  |



Table S2: Mean Absolute Error (MAE) between actual and predicted drug sensitivities ( $AUC$  and different  $IC$ 's) for 2 methods; RF and FRF. In FRF, node cost is calculated using 8  $IC$  regions. Here, results of all 140 drugs of GDSC database  $v5$  are shown.

| Drug Name    | Model | $AUC$  | $IC_{10}$ | $IC_{20}$ | $IC_{30}$ | $IC_{40}$ | $IC_{50}$ | $IC_{60}$ | $IC_{70}$ | $IC_{80}$ | Average |
|--------------|-------|--------|-----------|-----------|-----------|-----------|-----------|-----------|-----------|-----------|---------|
| BMS-708163   | RF    | 0.0293 | 1.5469    | 1.3072    | 1.1329    | 0.9999    | 0.8894    | 0.8073    | 0.7513    | 0.7346    | 1.0212  |
|              | FRF   | 0.026  | 1.4647    | 1.2511    | 1.1       | 0.9713    | 0.8609    | 0.7795    | 0.733     | 0.7283    | 0.9861  |
| PF-4708671   | RF    | 0.0292 | 1.1894    | 1.0955    | 1.0303    | 0.9893    | 0.9533    | 0.9387    | 0.9444    | 0.9531    | 1.0118  |
|              | FRF   | 0.0324 | 1.1888    | 1.0877    | 1.0284    | 0.9863    | 0.9572    | 0.9354    | 0.9332    | 0.9525    | 1.0087  |
| JNJ-26854165 | RF    | 0.0497 | 0.9948    | 0.9099    | 0.8831    | 0.888     | 0.9249    | 0.9739    | 1.0338    | 1.1382    | 0.9683  |
|              | FRF   | 0.0542 | 1.0047    | 0.9112    | 0.879     | 0.8797    | 0.9081    | 0.9501    | 1.0172    | 1.1193    | 0.9587  |
| TW 37        | RF    | 0.0997 | 1.1688    | 1.0726    | 1.0199    | 1.0149    | 0.9969    | 1.0216    | 1.0692    | 1.1546    | 1.0648  |
|              | FRF   | 0.1119 | 1.1604    | 1.0587    | 1.0154    | 1.0005    | 1.0044    | 1.0245    | 1.0704    | 1.1612    | 1.0619  |
| CCT018159    | RF    | 0.0444 | 0.9253    | 0.9811    | 1.0433    | 1.0947    | 1.1444    | 1.198     | 1.269     | 1.3503    | 1.1258  |
|              | FRF   | 0.0455 | 0.8995    | 0.9516    | 1.0032    | 1.0567    | 1.1122    | 1.1703    | 1.239     | 1.3314    | 1.0955  |
| AG-014699    | RF    | 0.032  | 1.2495    | 1.2112    | 1.1764    | 1.1557    | 1.1313    | 1.113     | 1.1076    | 1.0955    | 1.155   |
|              | FRF   | 0.0295 | 1.2243    | 1.179     | 1.1516    | 1.1296    | 1.1092    | 1.094     | 1.0816    | 1.0694    | 1.1298  |

Number of Bootstrap Sets in Each Bin

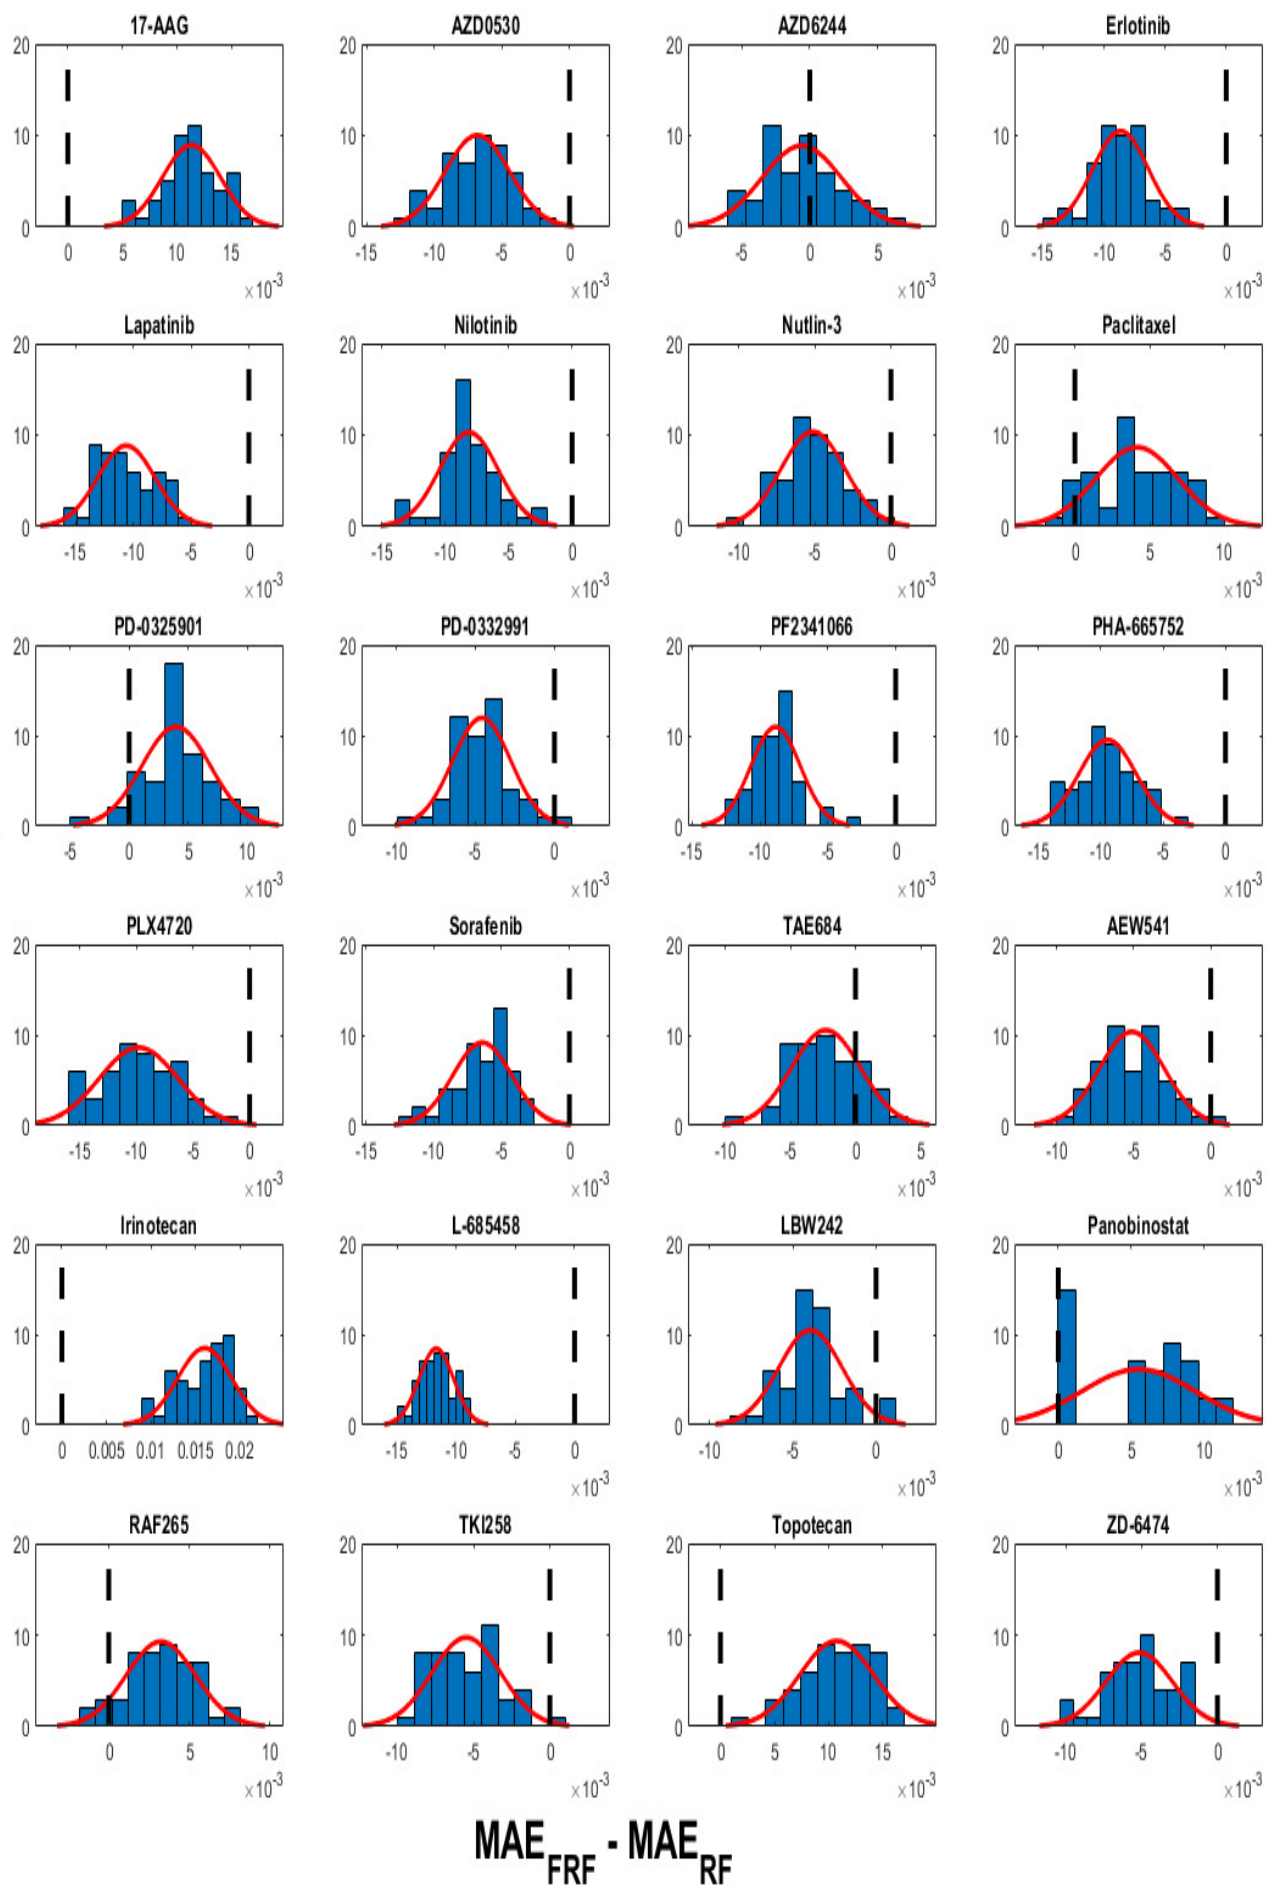

Figure S2: Distributions of MAE differences between FRF and RF predictions for the 50 bootstrap set show the robustness of FRF models.

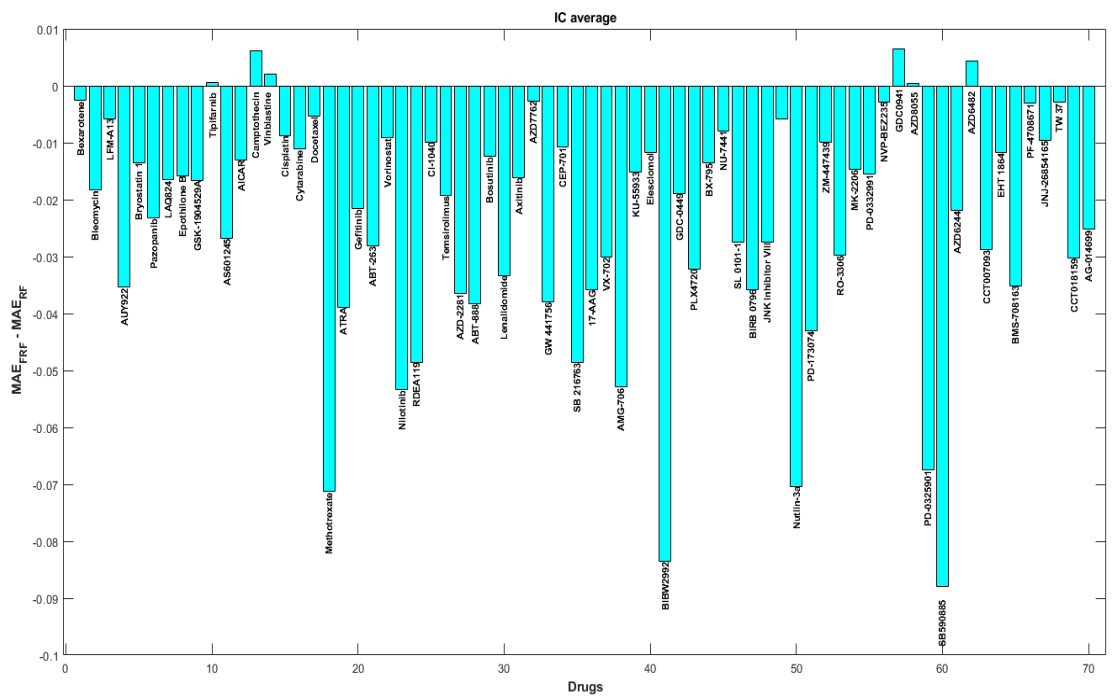

Figure S3: Difference between MAE of FRF and MAE of RF for Average IC values for 70 drugs of GDSC (rest 70 in main manuscript).
